# Supplementary material
Source: HighWire-hosted journal article supplement (http://www.annfammed.org/highwire/filestream/8852/field_highwire_adjunct_files/0/Wong_Supp_Apps.pdf)
Supplement: Wong_Supp_Apps.pdf [file Wong_Supp_Apps.pdf]

Supplemental materials for:

Wong SY, Sun Y, Chan A, et al. Treating subthreshold depression in primary care: a randomized controlled trial of behavioral activation with mindfulness. *Ann Fam Med*. 2018;16(2):111-119.

## Supplementary Tables

sTable 1 Primary outcome change after adjusted by different factors

| Scales                                       | Phase(sample size: BA, CAU) | Observed data                    |        |
|----------------------------------------------|-----------------------------|----------------------------------|--------|
|                                              |                             | Between-group difference(95% CI) | P      |
| BDI-II<br>(Adjusted baseline marital status) | T0(115,116)                 |                                  |        |
|                                              | T1(104,114)                 | -3.42(-5.21,-1.64)               | <0.001 |
|                                              | T2(85,103)                  | -2.46(-4.86,-0.06)               | 0.045  |
|                                              | T3(82,101)                  | -3.51(-6.00,-1.02)               | 0.006  |
| Adjusted by different batches                | T1(104,114)                 | -3.43(-5.19,-1.66)               | <0.001 |
|                                              | T2(85,103)                  | -2.33(-4.72,0.06)                | 0.056  |
|                                              | T3(82,101)                  | -3.36(-5.83,-0.88)               | 0.008  |
| Adjusted by location                         | T1(104,114)                 | -3.42(-5.19,-1.65)               | <0.001 |
|                                              | T2(85,103)                  | -2.26(-4.65,0.13)                | 0.063  |
|                                              | T3(82,101)                  | -3.34(-5.81,-0.87)               | 0.008  |

Note. BA: Behavioral Activation; CAU: Care as Usual; T0: baseline; SD: Standard Deviation; BDI-II: Beck Depression Inventory-II; T0: baseline; T1: post-intervention; T2: 5-month follow-up; T3: 12-month follow-up.

sFigure 1. BDI-II change of BAM and CAU group

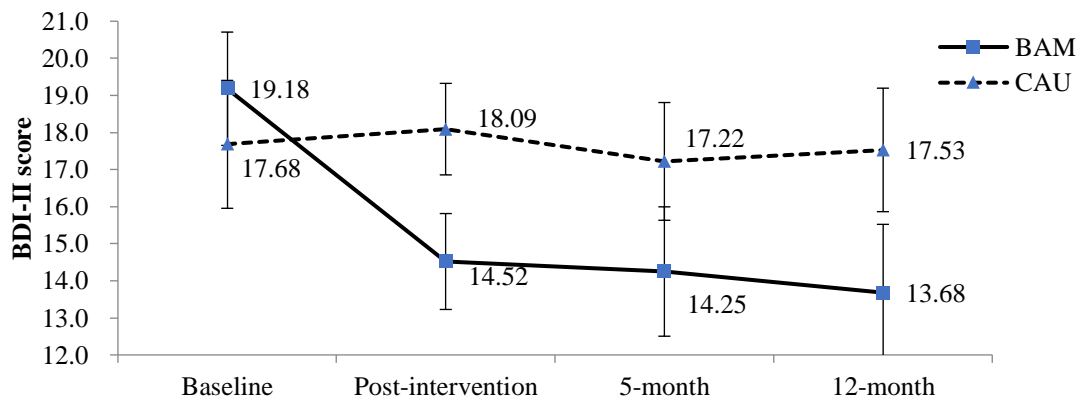

Note. BDI-II: Beck Depression Inventory-II. BAM: Behavioral Activation with Mindfulness; CAU: Care as Usual.

sFigure 2. SF-12 (PCS) change of BAM and CAU group

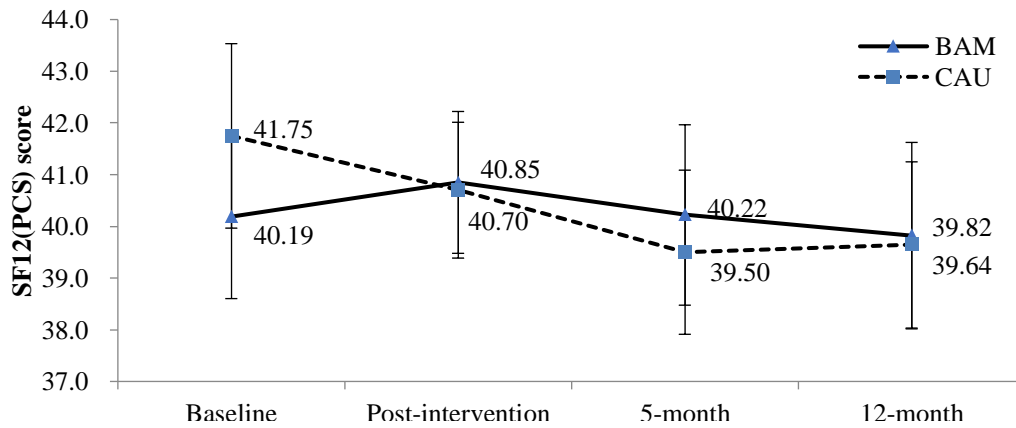

Note. SF-12: Medical Outcomes Study Short-Form Health Survey; PCS: mental component summary. BAM: Behavioral Activation with Mindfulness; CAU: Care as Usual.

sFigure 3. SF-12 (MCS) change of BAM and CAU group

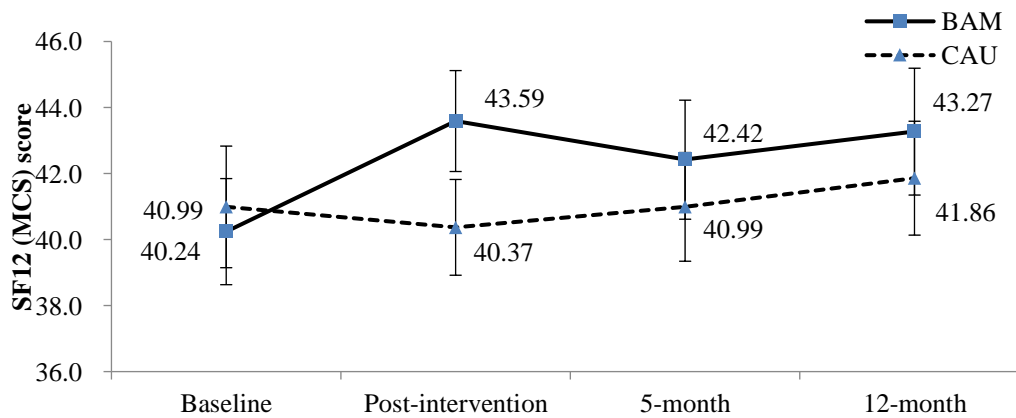

Note. SF-12: Medical Outcomes Study Short-Form Health Survey; MCS: mental component summary. BAM: Behavioral Activation with Mindfulness; CAU: Care as Usual.

sFigure 4. ACCQ change of BAM and CAU group

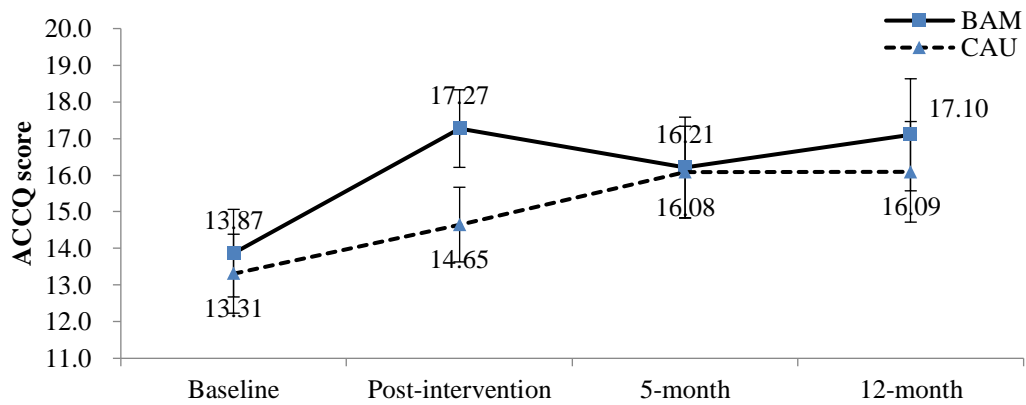

Note. ACCQ: Activity and Circumstantial Change. BAM: Behavioral Activation with Mindfulness; CAU: Care as Usual.

sFigure 5. SDS change of BAM and CAU group

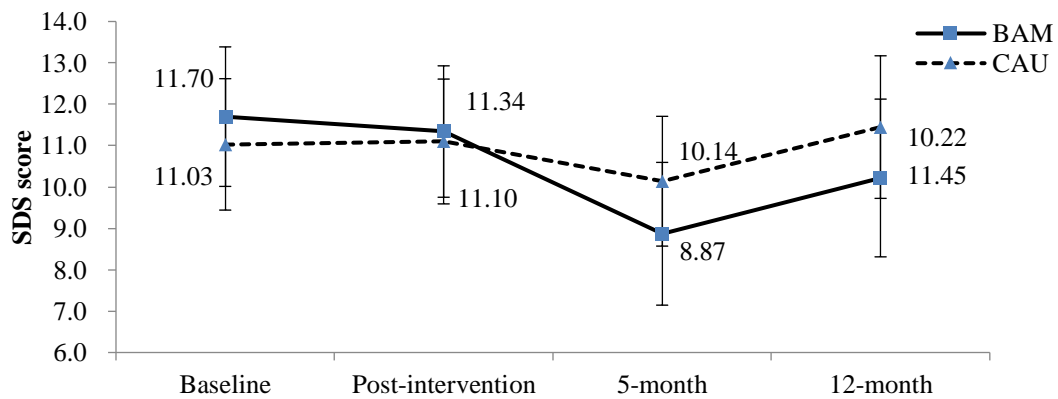

Note. SDS: The Sheehan Disability Scale. BAM: Behavioral Activation with Mindfulness; CAU: Care as Usual.

sFigure 6. STAI-S change of BAM and CAU group

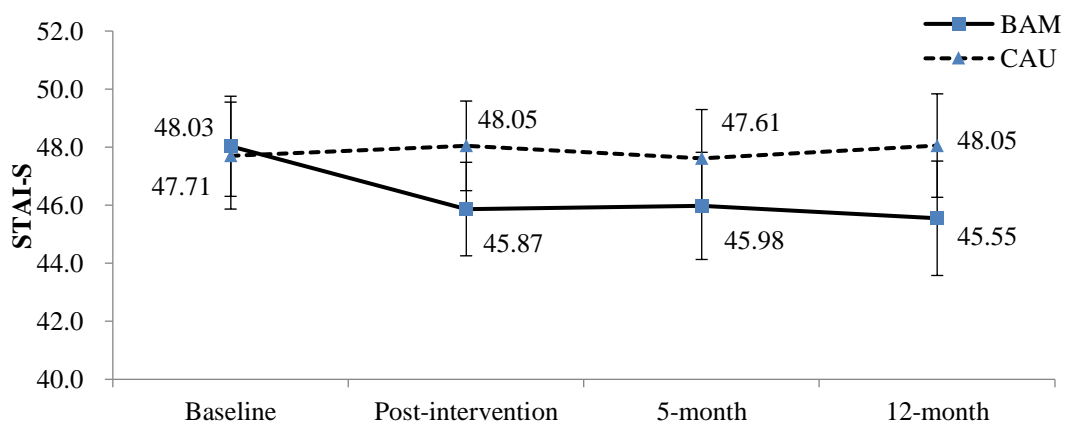

Note. STAI-S: The State Trait Anxiety Inventory-State. BAM: Behavioral Activation with Mindfulness; CAU: Care as Usual.

sFigure 7. STAI-T change of BAM and CAU group

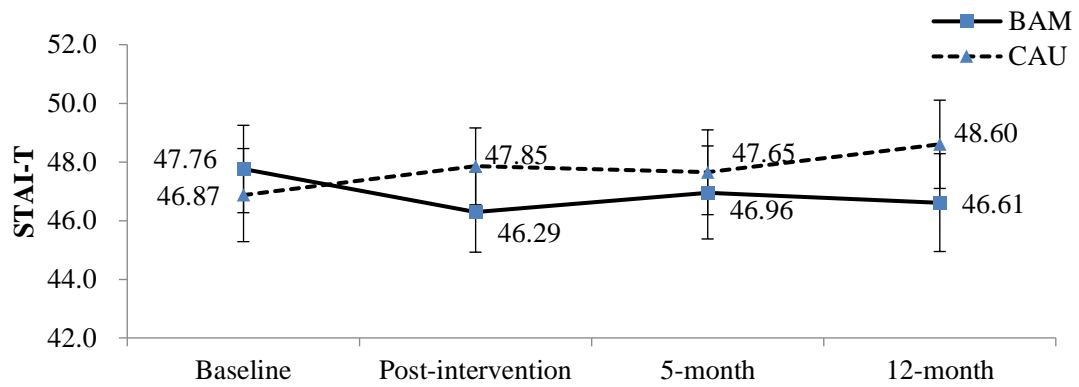

Note. STAI-T: The State Trait Anxiety Inventory-Trait. BAM: Behavioral Activation with Mindfulness; CAU: Care as Usual.

## Treatment Outline

### SESSION 1: Wellbeing and Happiness

| <u>Objectives</u>                                                  | <u>Content and Activities</u>                                                                                                                                                      |
|--------------------------------------------------------------------|------------------------------------------------------------------------------------------------------------------------------------------------------------------------------------|
| Introduction<br>(30 min)                                           | Intervention overview<br>Agenda setting for the session<br>Communicating group rules<br>Self-introduction<br>Getting to know you<br>Expectation of participants                    |
| Understanding the underlying concepts of the intervention (45 min) | Sharing on happiness and wellbeing<br>Self-reflection<br>What determines your level of happiness                                                                                   |
| Keeping track of activities<br>(30 min)                            | Concepts of behavior and mood monitoring Identifying current pattern of activities<br>Going through example of the activity record sheet                                           |
| Conclusion<br>Homework (HW) setting<br>Closing (15 min)            | Consolidation of learning: Review main points covered<br>Explain the HW task and its use in the next session<br>Preview of next session : Topics to be covered in the next session |

### SESSION 2: Identifying Happiness Boosting Activities and Finding Time to Do Them

| <u>Objectives</u>                                                                       | <u>Content and Activities</u>                                                                                                                                       |
|-----------------------------------------------------------------------------------------|---------------------------------------------------------------------------------------------------------------------------------------------------------------------|
| Review Previous session<br>Homework<br>Understanding one's activity pattern<br>(30 min) | Recap previous learning<br>Review activity chart<br>Level of activity<br>Connecting activity with mood<br>Connecting activity with life goals                       |
| Identifying life goals<br>(45 min)                                                      | Importance of life goals<br>Identifying own life goals<br>Life time goal; Goal for the next three years; Goal for the next six months<br>Priorities in goal setting |
| Matching activities with one's life goals<br>(30 min)                                   | Listing activities that help achieving one's life goals<br>Brainstorming activities<br>Prioritizing activities<br>Introducing enjoyable activities                  |
| Conclusion                                                                              | Consolidation of learning: Review main points covered                                                                                                               |

|                                           |                                                                   |
|-------------------------------------------|-------------------------------------------------------------------|
| Homework (HW) setting<br>Closing (15 min) | Explain the HW task and its use in the next session               |
|                                           | Preview of next session: Topics to be covered in the next session |

### **SESSION 3: Identifying Happiness Boosting Activities and Finding Time to Do**

#### **Them**

| <u>Objectives</u>                                                                          | <u>Content and Activities</u>                                                                                                                                                                                                          |
|--------------------------------------------------------------------------------------------|----------------------------------------------------------------------------------------------------------------------------------------------------------------------------------------------------------------------------------------|
| Review Previous session<br>Homework<br>Understanding one's<br>activity pattern<br>(30 min) | Recap previous learning<br>Review activity chart<br>Level of activity<br>Connecting activity with mood; Connecting activity with<br>life goals                                                                                         |
| Committing to action<br>Planning and time<br>management<br>(45 min)                        | Sharing on the importance of planning and activities<br>scheduling<br>Activities in action<br>Activities scheduling; Weekly activities schedule; Daily<br>activities schedule<br>Making To Do List<br>Making minute-to-minute decision |
| Getting activated (30 min)                                                                 | Generating more activities that act towards one's life goals<br>Listing and prioritizing more activities towards one's life<br>goal                                                                                                    |
| Conclusion<br>Homework (HW)setting<br>Closing (15 min)                                     | Consolidation of learning: Review main points covered                                                                                                                                                                                  |
|                                                                                            | Explain the HW task and its use in the next session                                                                                                                                                                                    |
|                                                                                            | Preview of next session: Topics to be covered in the next<br>session                                                                                                                                                                   |

### **SESSION 4: Managing Procrastination and Staying Motivated Review and**

#### **Maintenance**

| <u>Objectives</u>       | <u>Content and Activities</u> |
|-------------------------|-------------------------------|
| Review Previous session | Recap previous learning       |

|                                                                                           |                                                                                                                                                                                                                                                            |
|-------------------------------------------------------------------------------------------|------------------------------------------------------------------------------------------------------------------------------------------------------------------------------------------------------------------------------------------------------------|
| Homework<br>Understanding one's<br>activity pattern<br>(20 min)                           | Review activity chart<br>Level of activity<br>Connecting activity with mood; Connecting activity with<br>life goals                                                                                                                                        |
| Understanding<br>procrastination<br>Defining procrastination<br>and avoidance<br>(80 min) | Illustrating procrastination using examples<br>Sharing on procrastination/avoidance<br>Self-reflection<br>Steps in making conscious decision about own behaviors<br>Techniques to break avoidance patterns and getting started<br>on importance activities |
| Conclusion<br>Homework (HW)setting<br>Closing (15 min)                                    | Consolidation of learning: Review main points covered<br>Explain the HW task and its use in the next session<br>Preview of next session: Topics to be covered in the next<br>session                                                                       |

**SESSION 5: BA Review and Mindfulness (30mins BA+90mins Mindfulness)**

| Objectives                                                                                 | Content and Activities                                                                                                                                                                          |
|--------------------------------------------------------------------------------------------|-------------------------------------------------------------------------------------------------------------------------------------------------------------------------------------------------|
| Review Previous session<br>Homework<br>Understanding one's<br>activity pattern<br>(20 min) | Recap previous learning<br>Review activity chart<br>Level of activity<br>Connecting activity with mood; Connecting activity with<br>life goals                                                  |
| Mindfulness<br>(85 min)                                                                    | General info to the concept of mindfulness<br>Raisin exercise – On automatic pilot and mindfulness<br>Feedback and discussion of exercise<br>Sitting meditation<br>Feedback and discussion      |
| Homework<br>(10 min)                                                                       | Discuss and assign<br>Sitting meditation – 10 min for 6 out of 7 days<br>Mindfulness of a routine activity e.g. walking, bathing<br>Distribute CDs, handouts, and practice record forms (5 min) |
| Brief psycho-education                                                                     | Consolidation of learning: Session summary                                                                                                                                                      |



|         |  |
|---------|--|
| (5 min) |  |
|---------|--|

**SESSION 6: BA Maintenance and Mindfulness (30mins BA+90mins Mindfulness)**

| <b>Objectives</b>                                       | <b>Content and Activities</b>                                                                                                                                                                                                                                        |
|---------------------------------------------------------|----------------------------------------------------------------------------------------------------------------------------------------------------------------------------------------------------------------------------------------------------------------------|
| Review Previous BA session<br>Homework<br>(20 min)      | Recap previous learning<br>Review activity chart<br>Level of activity<br>Connecting activity with mood; Connecting activity with life goals                                                                                                                          |
| Enhancing energy and preventing burnout(BA)<br>(10 min) | Well-being tips<br>Sharing on tips to enhance energy and prevent burnout<br>Taking care of oneself                                                                                                                                                                   |
| Review Previous Mindfulness Homework<br>(80 min)        | Review homework (sitting meditation): discussion of how it went<br>Review homework: mindfulness of ordinary activities<br>Body Scan<br>Sensation/Meditation<br>Discussion<br>Brainstorm: How might they extend this mindfulness state to other areas of their lives? |
| Homework (5 min)                                        | Discuss and assign                                                                                                                                                                                                                                                   |
| Conclusion (5 min)                                      | Review main points covered<br>Summarize                                                                                                                                                                                                                              |

**SESSION 7: BA Maintenance and Mindfulness (30min BA+90min Mindfulness)**

| <b>Objectives</b>                                                                        | <b>Content and Activities</b>                                                                                                                 |
|------------------------------------------------------------------------------------------|-----------------------------------------------------------------------------------------------------------------------------------------------|
| Review Previous session Homework(BA)<br>Understanding one's activity pattern<br>(20 min) | Recap previous learning<br>Review activity chart<br>Level of activity<br>Connecting activity with mood<br>Connecting activity with life goals |
| Sustaining changes (BA)<br>(10 min)                                                      | Phasing out the program<br>Strategies in phasing out the BA program                                                                           |

|                                                        |                                                          |
|--------------------------------------------------------|----------------------------------------------------------|
| Review<br>Previous Mindfulness<br>Homework<br>(80 min) | Walking Meditation<br>Practice review<br>Homework review |
| Homework (5 min)                                       | Discuss and assign                                       |
| Conclusion<br>(5 min)                                  | Review main points covered<br>Summarize                  |

### **SESSION 8: BA and Mindfulness Review (1 hour BA and 1 hour Mindfulness)**

| <b>Objectives</b>                                                                       | <b>Content and Activities</b>                                                                                                                                                                                                                                                                     |
|-----------------------------------------------------------------------------------------|---------------------------------------------------------------------------------------------------------------------------------------------------------------------------------------------------------------------------------------------------------------------------------------------------|
| BA Progress Review<br>Refining one's life goals<br>and pursuing these goals<br>(55 min) | Identifying changes that have been made<br>Strategies in maintaining changes<br>Common obstacles; Guideline for maintaining changes;<br>Problem solving<br>Choosing to give up a goal<br>Refining lifetime goals<br>Identifying more activities toward one's life goals                           |
| Previous Mindfulness<br>Homework Review<br>(55 min)                                     | Body Scan (40 min)<br>Practice review: Check how the participants went with their<br>home meditation practice<br>What they experienced?<br>When did they not do their practice or have difficulty<br>finding time to do practice?<br>Mindfulness in everyday activities: What did they<br>notice? |
| Conclusion<br>(10 min)                                                                  | Program close: Summarize progress made and future goals<br>Celebration: prompt the group to celebrate their<br>achievement and positive traits<br>Achievement: Certificate of completion                                                                                                          |
